# Supplementary material for: New Insights on Moojase, a Thrombin-Like Serine Protease from Bothrops moojeni Snake Venom
Source: PubMed Central journal article supplement (PMC6316876; doi:10.3390/toxins10120500), 2018-11-28
Supplement: toxins-10-00500-s001.pdf [file toxins-10-00500-s001.pdf]

## Supplementary Materials: New Insights on Moojase, a Thrombin-Like Serine Protease from *Bothrops moojeni* Snake Venom

Fernanda G. Amorim, Danilo L. Menaldo, Sante E. I. Carone, Thiago A. Silva, Marco A. Sartim, Edwin De Pauw, Loic Quinton and Suely V. Sampaio

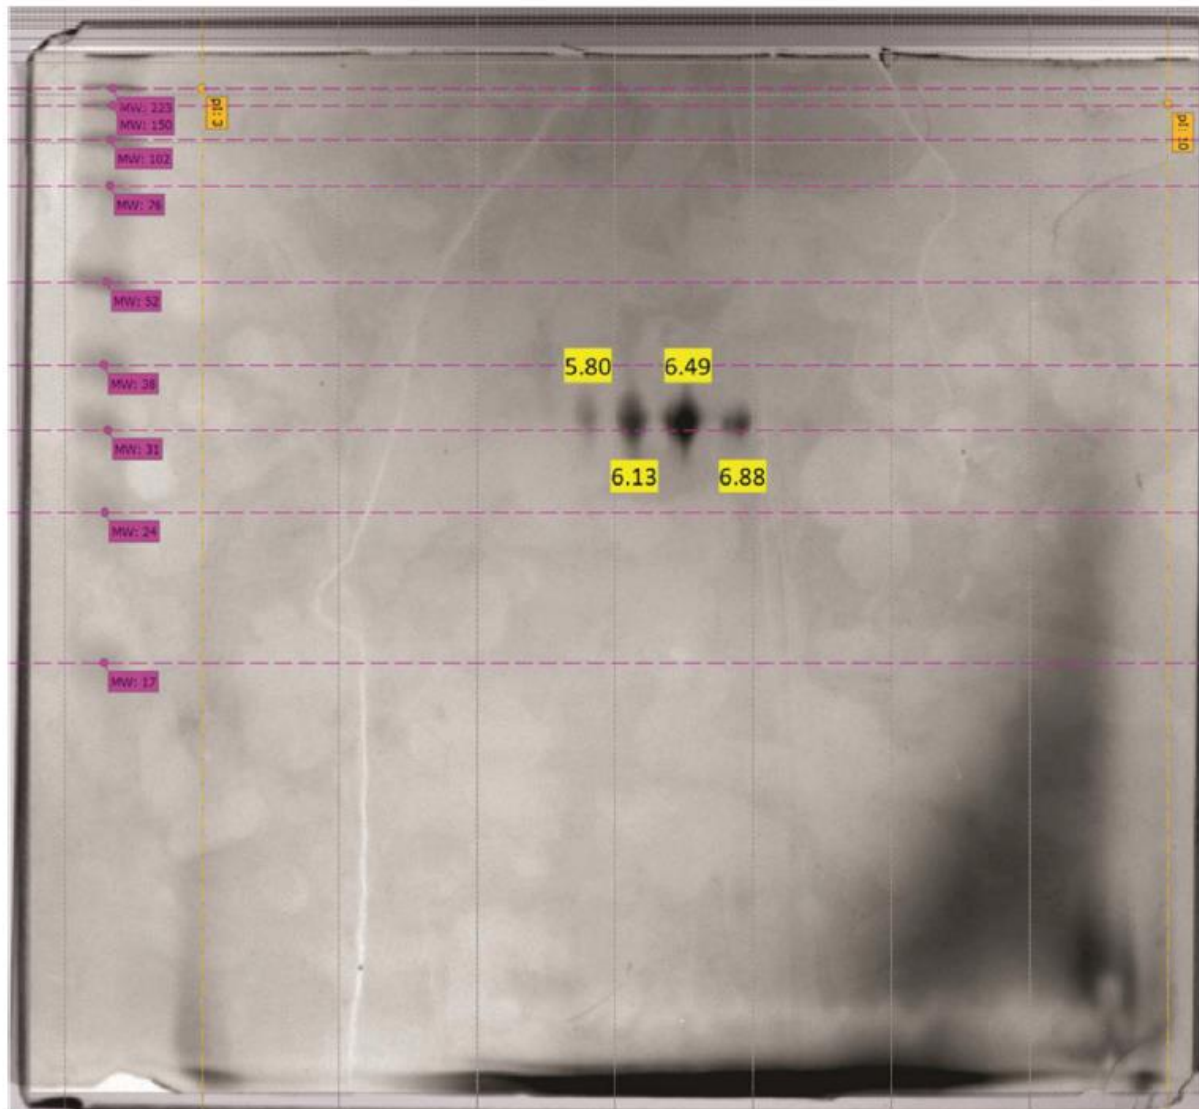

**Figure S1.** Isoelectric focusing of Moojase. Moojase presented four protein bands, indicating different pI values ranging from 5.80 to 6.88.

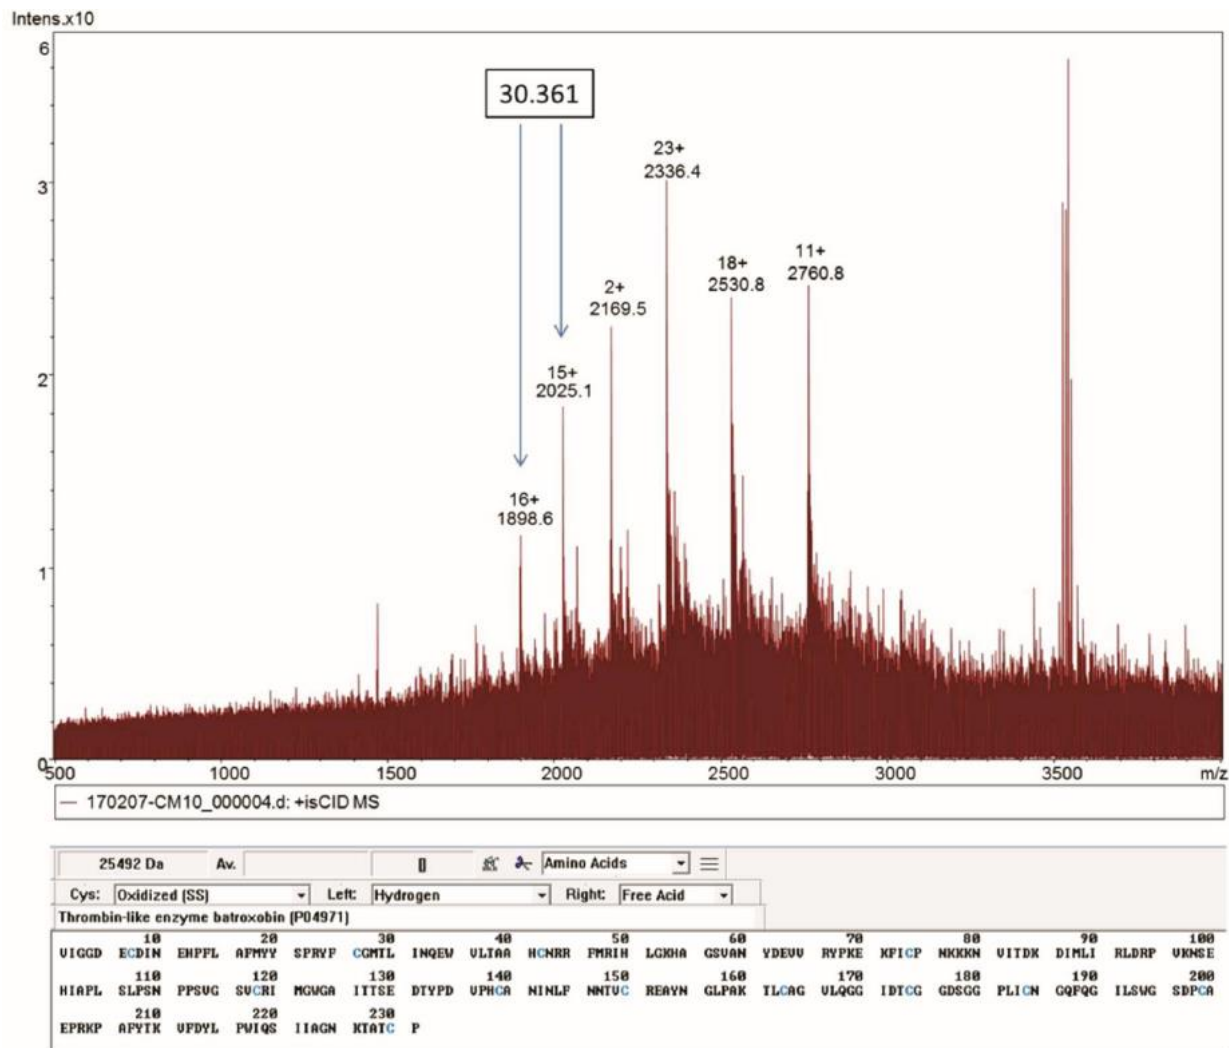

**Figure S2.** Molecular mass determination by Bruker Solarix 9.4T FTICR mass spectrometer. The mass spectra show the practical molecular mass calculated based on 16-time charge. The box below presents the theoretical molecular mass of Moojase oxidized predicted by Sequence Editor software.

A

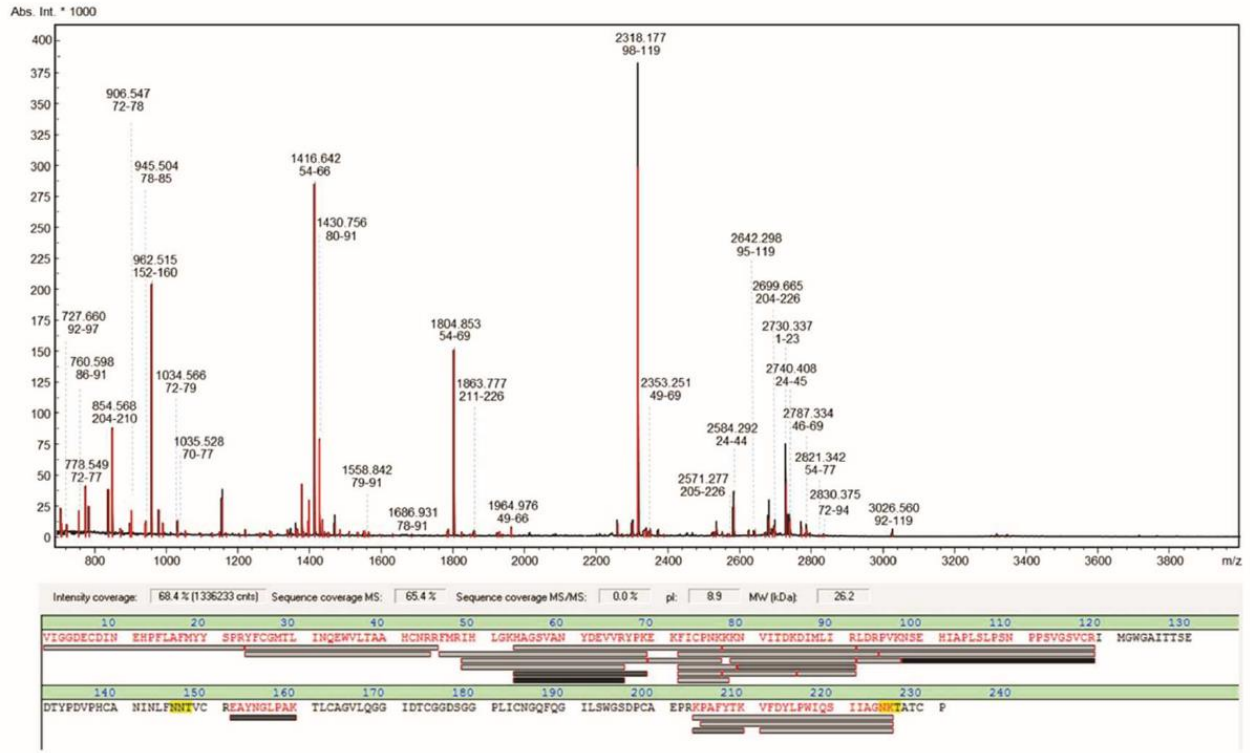

B

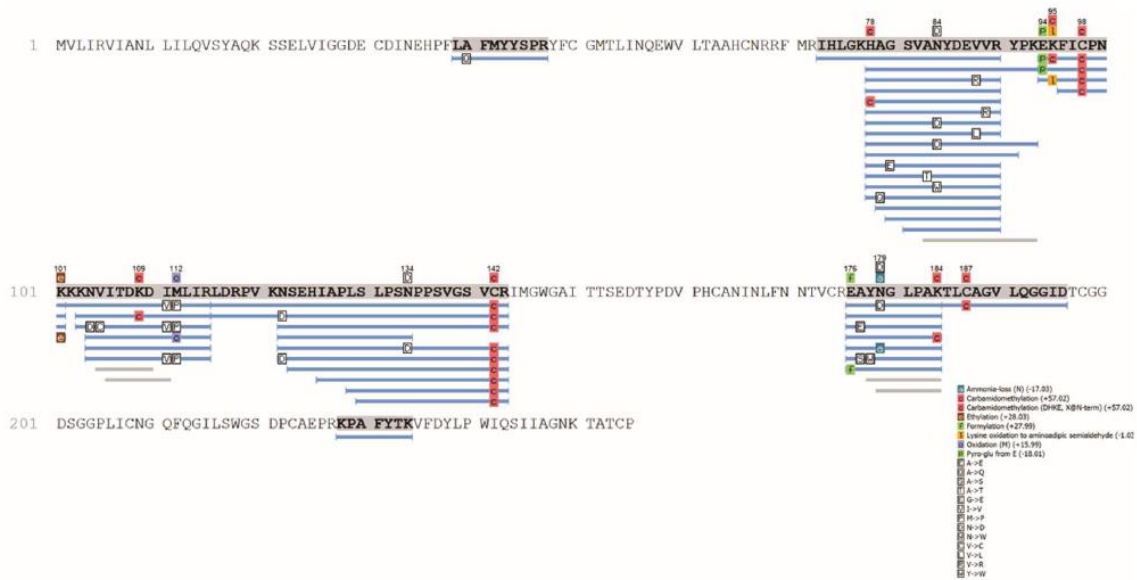

C

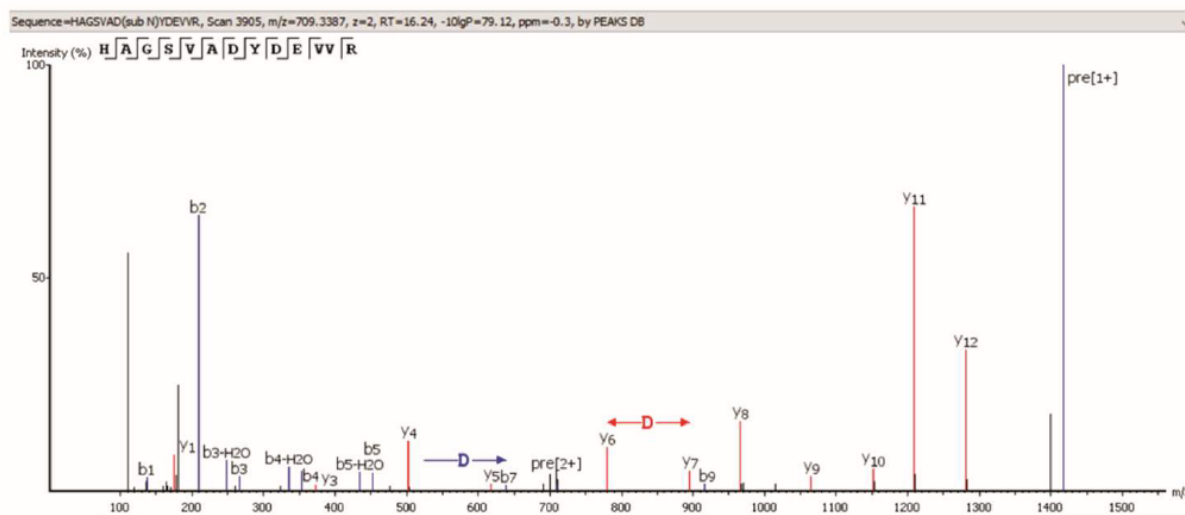

D

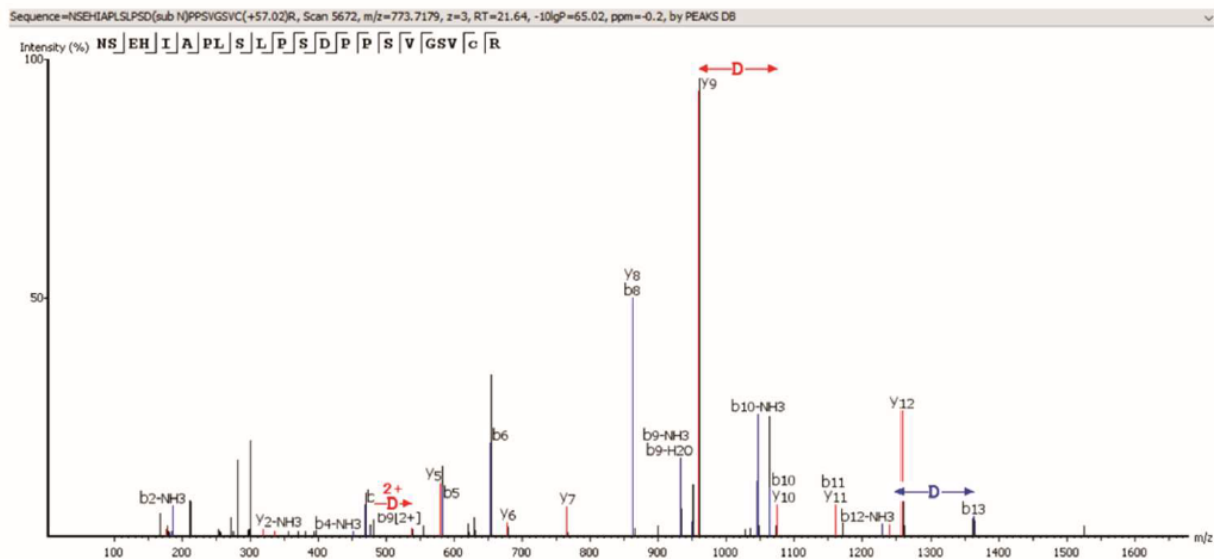

## E

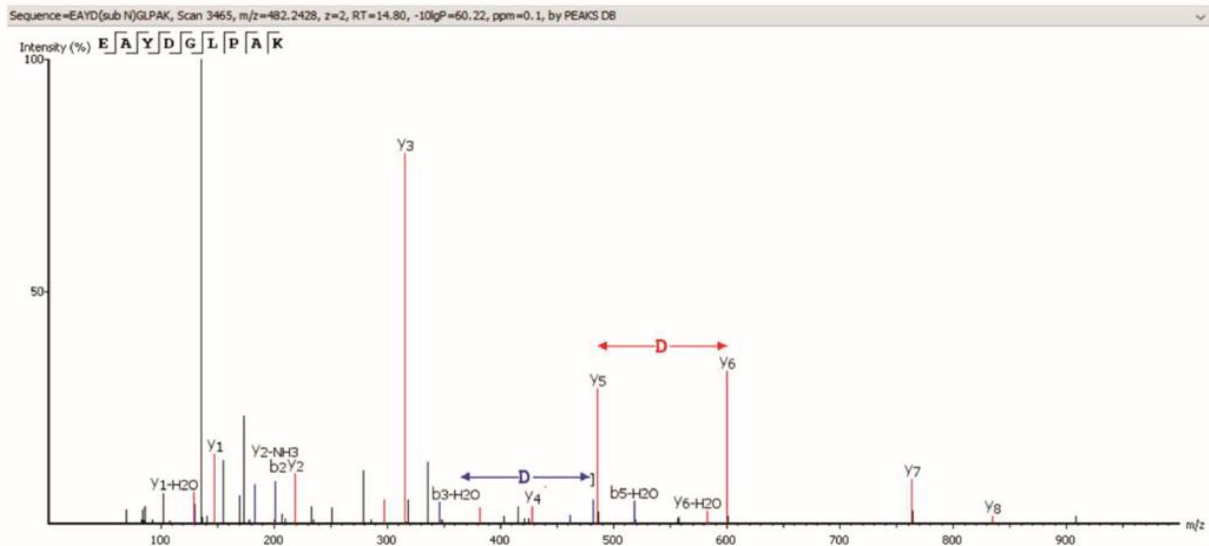

**Figure S3.** Structural analysis of Moojase by mass spectrometry. (A) MALDI-TOF sequencing of Moojase, which covered 65.4% of the sequence template (Batroxobin). (B) Q-Exactive sequencing using Batroxobin as a template. The fragments that were sequenced in this methodology are marked in blue. (C–E) Sequencing of the fragments that presented the punctual mutations at positions 60, 110 and 123 of the template sequence.
